# Supplementary material for: Cohen syndrome due to a novel stop-gain mutation in VPS13B gene: A case report and comparative study in affected siblings worldwide
Source: Research Square preprint supplement (doi:10.21203/rs.3.rs-3942856/v1), 2024-02-21
Supplement: Supplementary file 1 [file 5fd4c9f199759c1dcde28d75.docx]

**Table2. Summary of the clinical signs of 71 siblings with CS from 33 families.**

| siblings | Age/sex | origin | consanguinity | Mental retardation | Hypotonia | developmental delay | retinopathy | Myopia | Microcephaly | Short stature | obesity | Joint laxity | Neutropenia | Typical face |
| --- | --- | --- | --- | --- | --- | --- | --- | --- | --- | --- | --- | --- | --- | --- |
| Case 1&2* | 16/M, 11/F | Iranian | + | 2/2 | 2/2 | 2/2 | 2/2 | 2/2 | 1/2 | 2/2 | 2/2 | 2/2 | 1/2 | 2/2 |
| Cohen (23) | 18/F,15/M | American | - | 2/2 | 2/2 | 2/2 | 2/2 | 2/2 | 2/2 | 1/2 | 1/2 | 2/2 | 0/2 | 2/2 |
| Kousseff (24) | 15,18/M&17,12F | Caucasian | - | 4/4 | 4/4 | 4/4 | 0/4 | 0/4 | 4/4 | 3/4 | 3/4 | 4/4 | 0/4 | 4/4 |
| NORIO (25) | 25F,21M | Finnish | + | 2/2 | 2/2 | 2/2 | 2/2 | 2/2 | 2/2 | 2/2 | 0/2 | 2/2 | 2/2 | 2/2 |
| NORIO(25) | 18M,13F | Finnish | + | 2/2 | 2/2 | 2/2 | 2/2 | 2/2 | 2/2 | 2/2 | 0/2 | 2/2 | 2/2 | 2/2 |
| Kondo (26) | 21,15M | Japanese | + | 2/2 | 2/2 | 2/2 | 2/2 | 2/2 | 2/2 | 2/2 | 0/2 | 2/2 | 2/2 | 2/2 |
| [Schlichtemeier](https://omim.org/entry/216550#50) (27) | 13M,17F | African/ American | - | 2/2 | 2/2 | 2/2 | 0/2 | 1/2 | 2/2 | 2/2 | 0/2 | 2/2 | 0/2 | 2/2 |
| Zhao (28) | 8.2M,5.8F | Chinese | - | 2/2 | 2/2 | 2/2 | ? | ? | ? | ? | 0/2 | 2/2 | 1/2 | 2/2 |
| Seifert (7) | 45,33F | Iranian | + | 2/2 | ? | 2/2 | 2/2 | 2/2 | 1/2 | 1/2 | 1/2 | ? | 0/2 | 2/2 |
| Seifert(7) | 25,23F | Iranian | + | 2/2 | ? | 2/2 | 2/2 | 2/2 | 2/2 | 0/2 | 2/2 | ? | 0/2 | 2/2 |
| Seifert (7) | 8,5F | German | - | 2/2 | ? | 2/2 | 2/2 | 2/2 | 2/2 | 2/2 | 0/2 | ? | 2/2 | 2/2 |
| Rejeb (8) | 12F,6M | Tunisian | - | 2/2 | 1/2 | 2/2 | 1/2 | 1/2 | 2/2 | 0/2 | 1/2 | 1/2 | 1/2 | 2/2 |
| NORTH(29) | 10F,1M | British | - | 2/2 | 2/2 | 2/2 | 2/2 | 0/2 | 0/2 | 2/2 | 2/2 | 0/2 | 0/2 | 2/2 |
| NORTH (29) | 8M,4F | British | - | 2/2 | 2/2 | 2/2 | 0/2 | 0/2 | 0/2 | 2/2 | 2/2 | 0/2 | 0/2 | 2/2 |
| [Young](https://omim.org/entry/216550#57) (30) | 15M,13,10F | Caucasian | - | 3/3 | 3/3 | 3/3 | 0/3 | 0/3 | 1/3 | 2/3 | 1/3 | 2/3 | 0/3 | 3/3 |
| Steinlein (31) | 30,28M | Caucasian | - | 2/2 | 2/2 | 2/2 | 2/2 | ? | 1/2 | 1/2 | 2/2 | 2/2 | 2/2 | 2/2 |
| North (32) | 8 ,8F | Irish/German, Irish/Scottish | - | 2/2 | 2/2 | 2/2 | 2/2 | 2/2 | 2/2 | 0/2 | 2/2 | 0/2 | 0/2 | 2/2 |
| Kolehmainen (33) |  | Finnish |  | 2/2 | ? | 2/2 | 2/2 | 2/2 | 2/2 | ? | 2/2 | 2/2 | 2/2 | 2/2 |
| Kolehmainen (33) |  | Finnish |  | 2/2 | ? | 2/2 | 2/2 | 2/2 | 2/2 | ? | 0/2 | 2/2 | ? | 2/2 |
| Kolehmainen (33) |  | Dutch |  | 2/2 | ? | 2/2 | 2/2 | 2/2 | 1/2 | ? | 2/2 | 2/2 | 2/2 | 2/2 |
| Kolehmainen (33) |  | British |  | 2/2 | ? | 2/2 | 1/2 | 1/2 | 2/2 | ? | 2/2 | 2/2 | 2/2 | 2/2 |
| Kolehmainen (33) |  | Belgian |  | 2/2 | ? | 2/2 | 2/2 | 2/2 | 2/2 | ? | 2/2 | 2/2 | 2/2 | 2/2 |
| Seifert (34) | 7,3.5M | French | - | 2/2 | ? | 2/2 | 1/2 | 1/2 | 2/2 | 2/2 | 2/2 | ? | 2/2 | 2/2 |
| Seifert (34) | 16.5F,14.5M | Turkish | + | 2/2 | ? | 2/2 | 0/2 | 0/2 | 2/2 | 2/2 | 2/2 | ? | ? | 2/2 |
| Seifert (34) | 5,3M | Polish | - | 2/2 | ? | 2/2 | 0/2 | 0/2 | 2/2 | 0/2 | 2/2 | ? | 2/2 | 2/2 |
| Seifert (34) | 8,5F | Turkish | + | 2/2 | ? | 2/2 | 0/2 | 1/2 | 1/2 | 1/2 | 1/2 | ? | ? | 2/2 |
| Chandler (35) | 16F,15M | Arabic | + | 2/2 | 2/2 | 2/2 | 2/2 | 2/2 | 2/2 | 2/2 | 2/2 | 2/2 | 0/2 | 2/2 |
| Chandler (35) | 28,15,22F | UK | + | 3/3 | 3/3 | 3/3 | 0/3 | 3/3 | 3/3 | 2/3 | 3/3 | 3/3 | 2/3 | 3/3 |
| Chandler (35) | 6,10F,12M | Arabic | + | 3/3 | 3/3 | 3/3 | 3/3 | 3/3 | 0/3 | 1/3 | 3/3 | 3/3 | 0/3 | 3/3 |
| Chandler (35) | 7,6M | UK | - | 2/2 | 2/2 | 2/2 | 2/2 | 2/2 | 2/2 | 1/2 | 2/2 | 2/2 | 2/2 | 2/2 |
| Chandler (35) | 9,15M | UK | - | 2/2 | 2/2 | 2/2 | 2/2 | 2/2 | 2/2 | 0/2 | 2/2 | 2/2 | 1/2 | 2/2 |
| Chandler (35) | 26,32M | Dutch | - | 2/2 | 2/2 | 2/2 | 2/2 | 2/2 | 1/2 | 1/2 | 2/2 | 2/2 | 2/2 | 2/2 |
| Chandler (35) | 3M,4F | UK | - | 2/2 | 2/2 | 2/2 | 2/2 | 2/2 | 2/2 | 2/2 | 2/2 | 2/2 | 2/2 | 2/2 |

* Our two patients
